# Supplementary material for: Engineering and optimisation of medically multi-functional mesoporous SiO2 fibers as effective wound dressing material
Source: Royal Society of Chemistry journal article supplement (doi:10.1039/c1jm11115a), 2011-01-01
Supplement: c1jm11115a.pdf [file c1jm11115a.pdf]

Journal: Journal of Materials Chemistry

Title of the paper: Engineering and optimisation of medically multi-functional mesoporous SiO<sub>2</sub> fibers as effective wound dressing material

Authors: Zhijun Ma<sup>1</sup>, Huijiao Ji<sup>2</sup>, Yu Teng<sup>1</sup>, Guoping Dong<sup>3,4</sup>, Dezhi Tan<sup>1</sup>, Miaoja Guan<sup>1</sup>,  
Jiajia Zhou<sup>1</sup>, Junhua Xie<sup>1</sup>,  
Jianrong Qiu<sup>1,3\*</sup> and Ming Zhang<sup>2\*</sup>

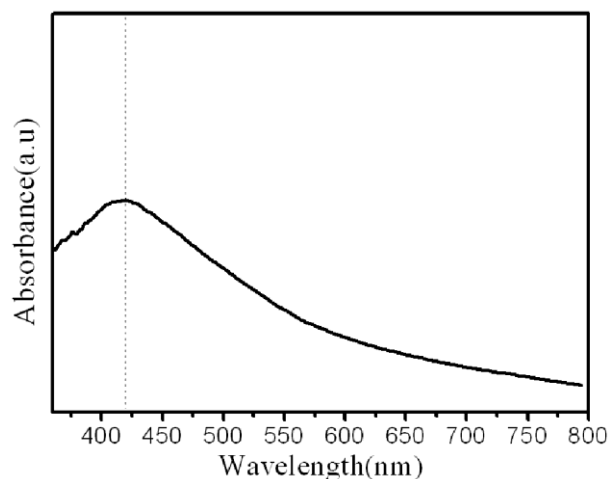

Fig. S1 UV-Vis spectrum of the AgNPs-containing SBF solution. This solution was obtained after the 0.1Ag-cSiO<sub>2</sub>@mSiO<sub>2</sub> was immersed in SBF for 10 hours (corresponding to the relatively fast release stage of silver)

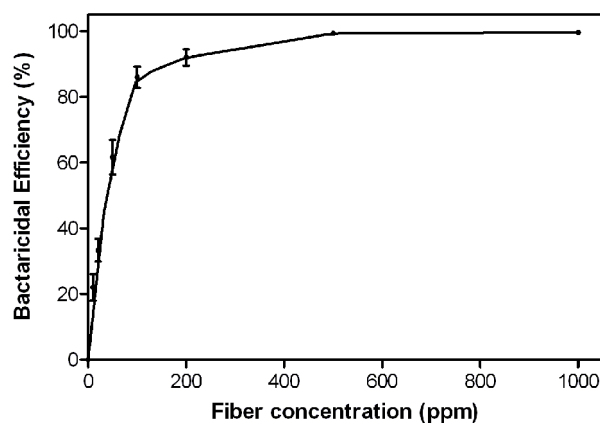

Fig. S2. Antibiotic efficiency of 0.1Ag-cSiO<sub>2</sub>@mSiO<sub>2</sub> as a function of sample

concentration.

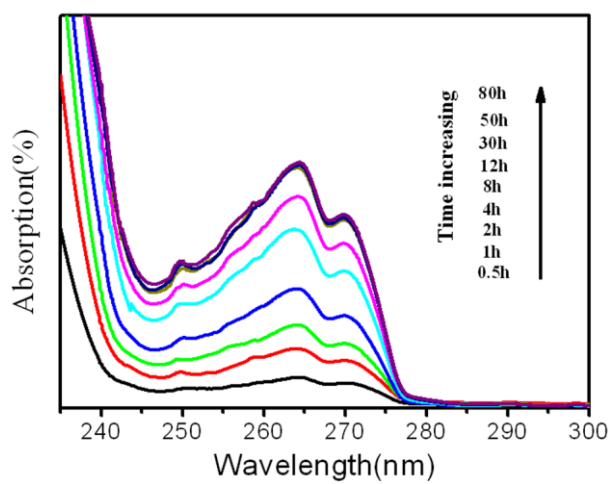

Fig. S3 UV-absorption spectrum of IBU-SBF solution as a function of release time. The IBU-release profile was plotted from the integrated intensity of the peak at 264 nm.
